# Supplementary material
Source: MDPI journal article supplement (https://www.mdpi.com/search?q=water-12-00735)
Supplement: s001 [file water-12-00735-s001.pdf]

## Evaluation of water quality in Ialomita River Basin in relationship with land cover patterns

Daniel Dunea <sup>1,\*</sup>, Petre Bretcan <sup>2,\*</sup>, Danut Tanislav <sup>2,\*</sup>, Gheorghe Serban<sup>3\*</sup>, Razvan Teodorescu<sup>4</sup>, Stefania Iordache<sup>1</sup>, Nicolae Petrescu <sup>1</sup>, Elena Tuchiu<sup>5</sup>

- 1 Faculty of Environmental Engineering and Food Science, Department of Environmental Engineering, Valahia University of Targoviste, Aleea Sinaia no. 13, 130004 Targoviste, jud. Dambovita, Romania; n\_petrescu06@yahoo.com; stefania.iordache@yahoo.com
- 2 Faculty of Humanities, Department of Geography, Valahia University of Targoviste, 130105 Targoviste, Romania
- 3 Faculty of Geography, Babes-Bolyai University, Clinicilor street, 5-7, 400006, Cluj-Napoca Romania
- 4 Faculty of Land Reclamation and Environmental Engineering, University of Agronomic Sciences and Veterinary Medicine of Bucharest, 59 Marasti Blvd, District 1, 011464, Bucharest, Romania; razvan.teodorescu@usamv.ro
- 5 National Administration "Romanian Waters" Edgar Quinet, 6, Bucharest, Romania, elena.tuchiu@rowater.ro,

\* Correspondence: petrebretcan@yahoo.com (P.B.); dtanislav@yahoo.com (D.T.); gheorghe.serban@ubbcluj.ro (G.S.), dan.dunea@valahia.ro (D.D.); Tel.: +40-245-206-105 (P.B.; D.T.); +40-769-076-854 (D.D.)

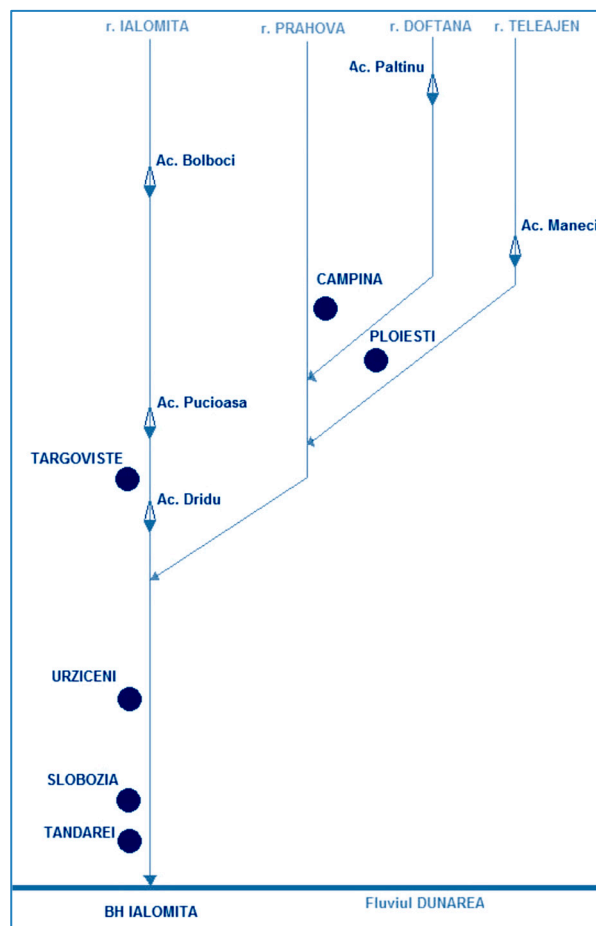

**Figure S1.** Water management scheme of Ialomita River Basin  
(National Administration of Romanian Waters <http://www.rowater.ro>)

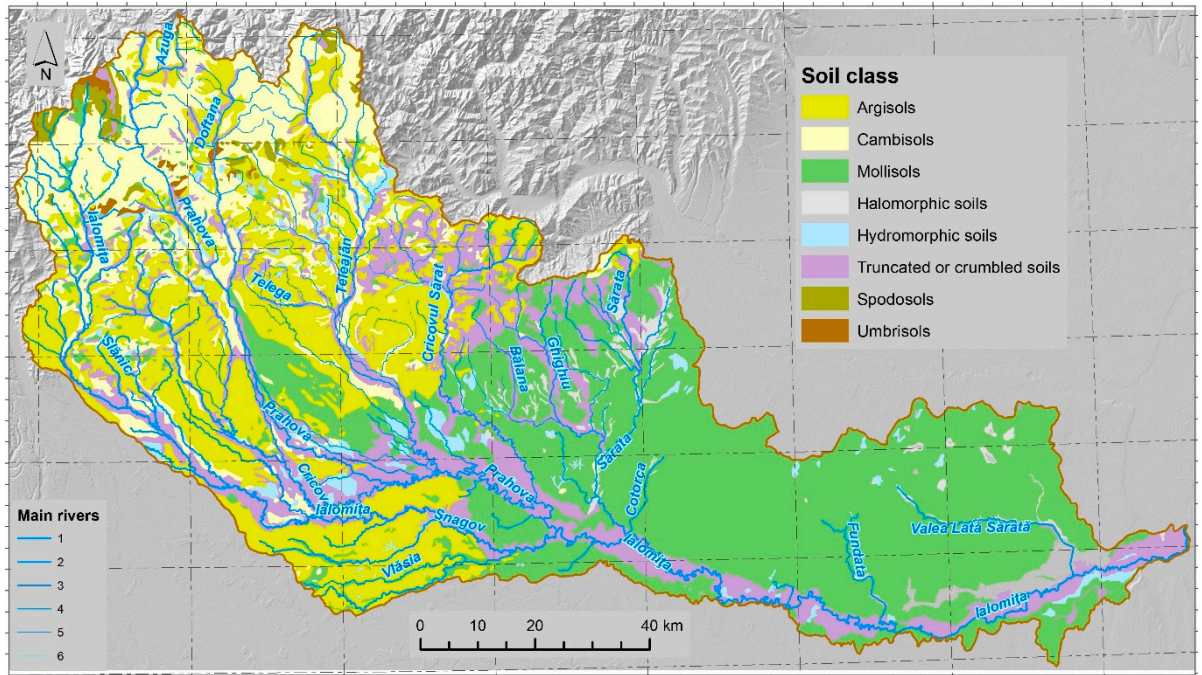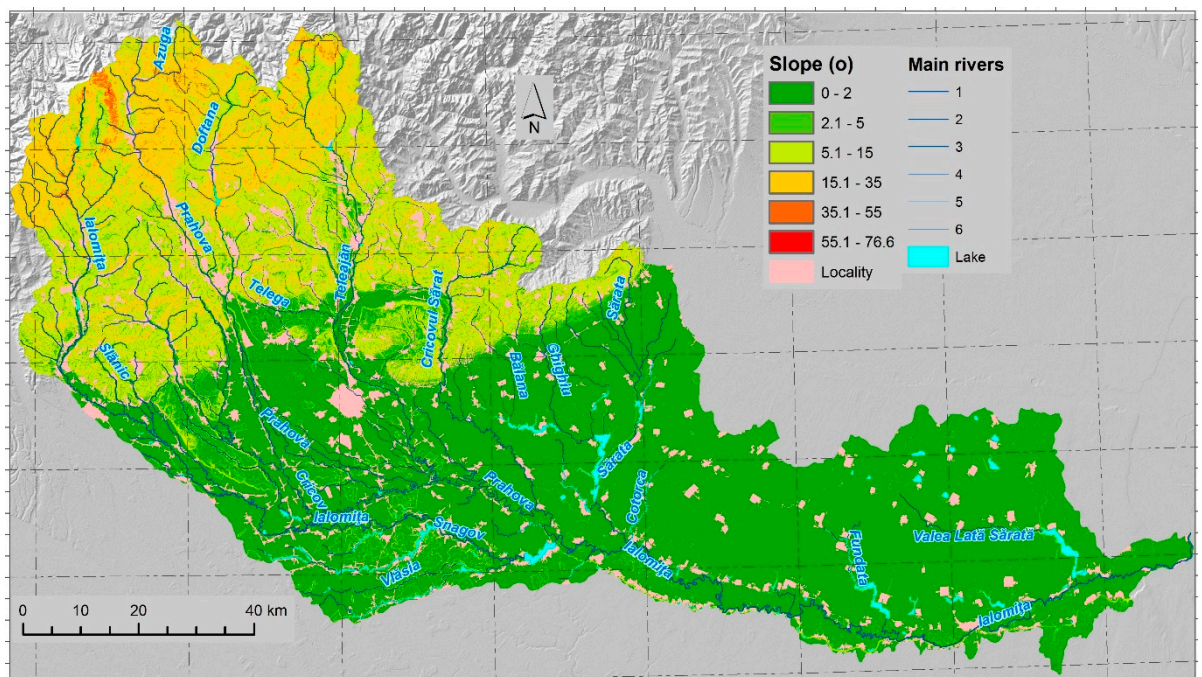

**Figure S2.** Soil and slope maps of Ialomița River Basin  
 (Source of soil data: <https://esdac.jrc.ec.europa.eu/content/soil-atlas-europe>)



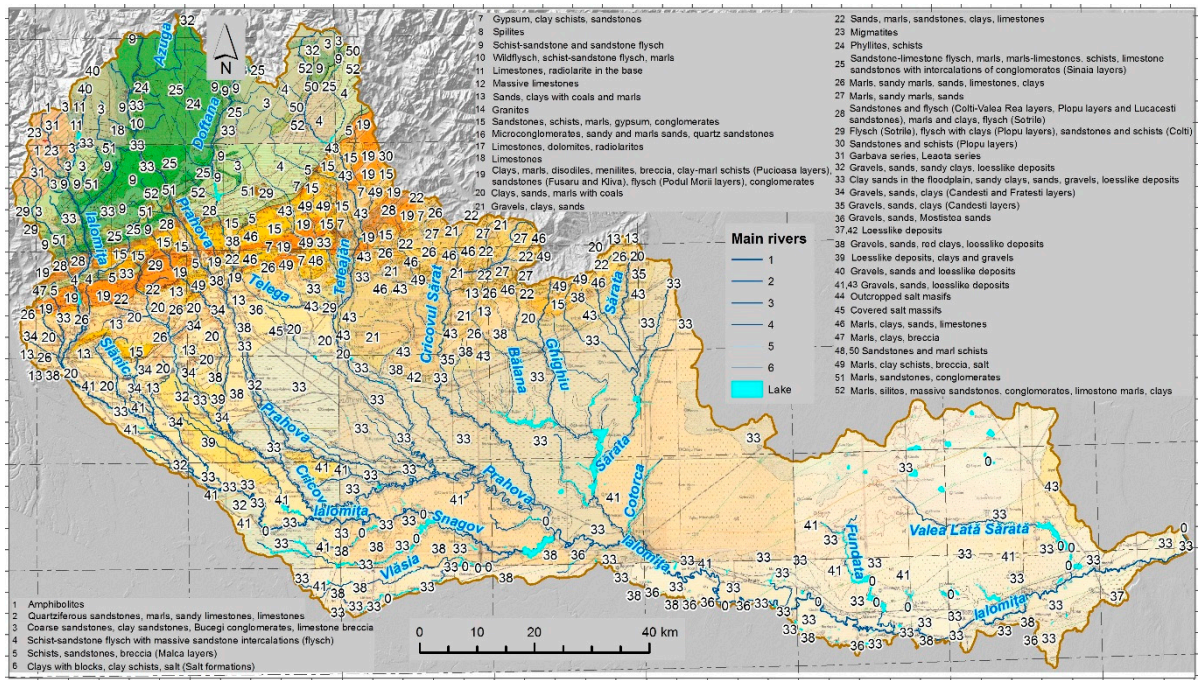

Figure S3. Geological map of Ialomita River Basin

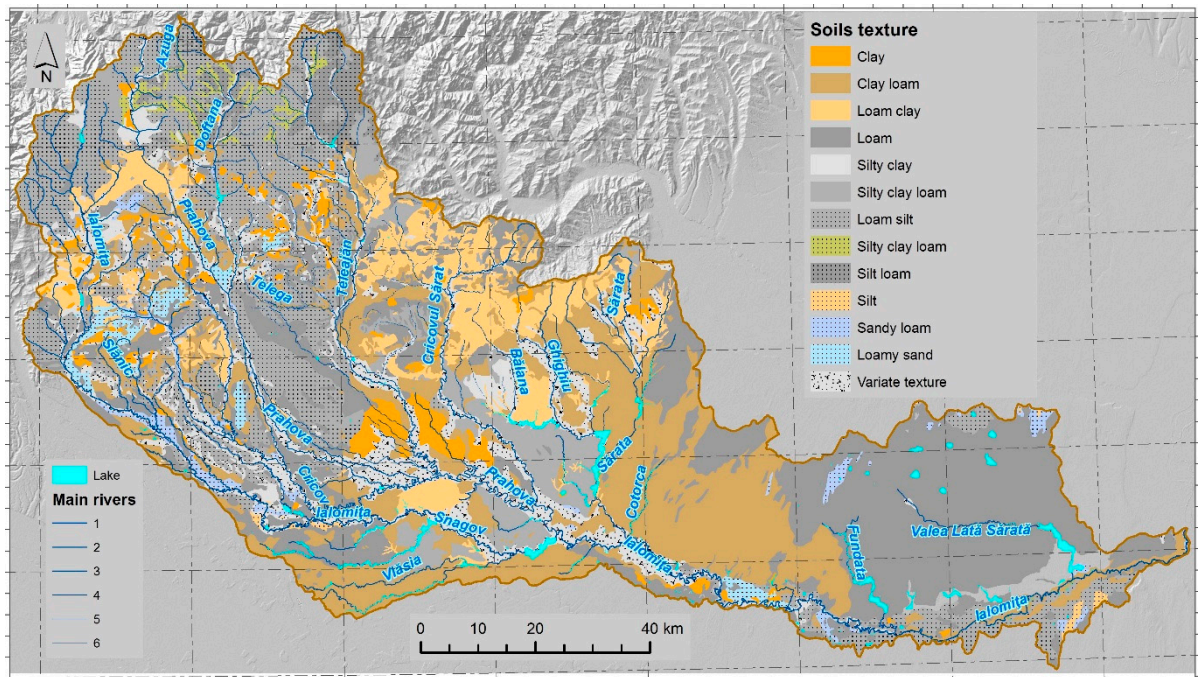

Figure S4. Soil texture map of Ialomita River Basin



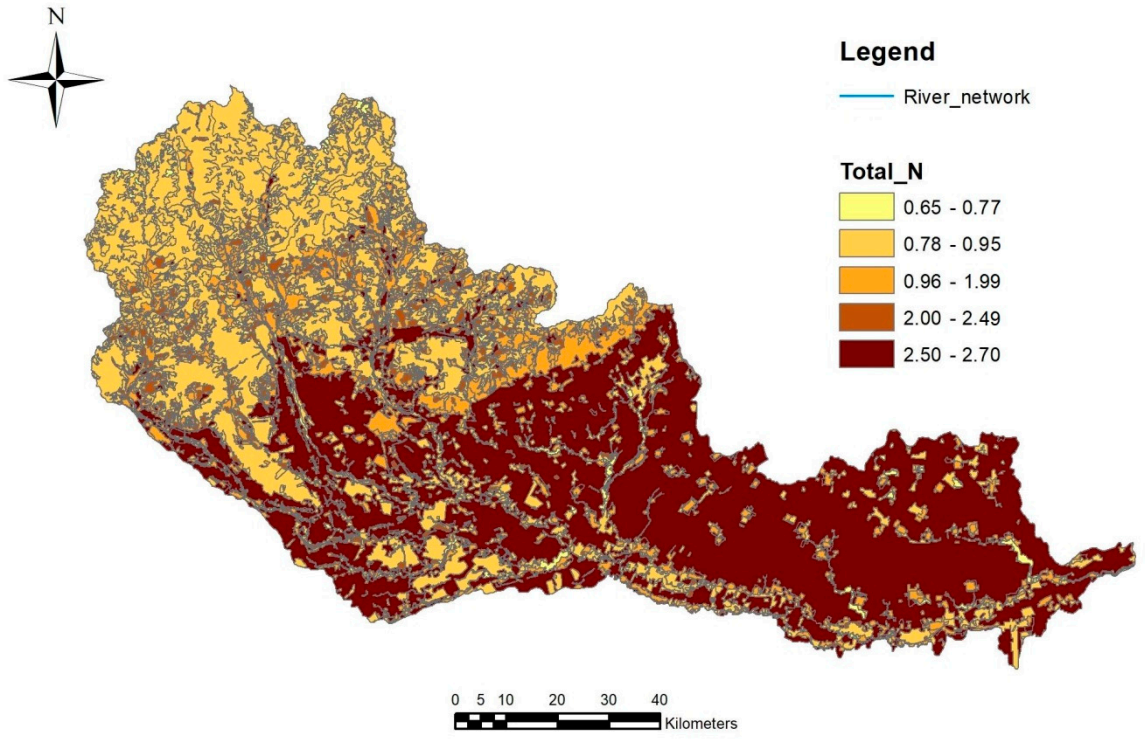

Figure S5. Reclassification of total nitrogen (mg/L) based on land cover

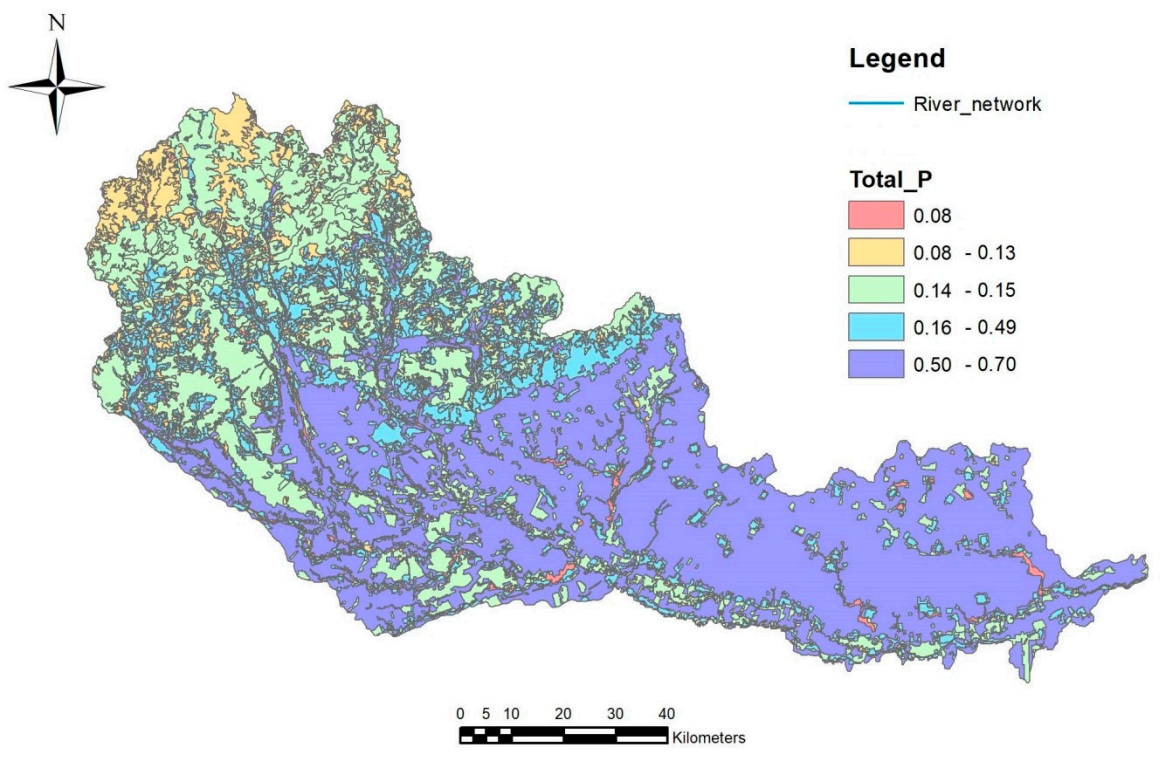

Figure S6. Reclassification of total phosphorous (mg/L) based on land cover

**Table S1.** Correlation matrix (n=107) of the variables recorded downstream Tandarei control section on Ialomita River between 2007 and 2016 (\*\* - correlations are significant at 0.01 level)

|            | pH | NH4N            | Alkalinity | NO3-N          | BOD5   | TSS    | DO             | PO4-P           |
|------------|----|-----------------|------------|----------------|--------|--------|----------------|-----------------|
| pH         | 1  | <b>-0.507**</b> | 0.009      | -0.153         | -0.094 | 0.133  | -0.010         | <b>-0.321**</b> |
| <i>p</i>   | -  | 0.000           | 0.925      | 0.115          | 0.336  | 0.171  | 0.920          | 0.001           |
| NH4-N      | -  | 1               | 0.090      | <b>0.494**</b> | 0.182  | -0.108 | 0.169          | <b>0.278**</b>  |
| <i>p</i>   | -  | -               | 0.354      | 0.000          | 0.061  | 0.267  | 0.082          | 0.004           |
| Alkalinity | -  | -               | 1          | <b>0.323**</b> | -0.141 | -0.055 | <b>0.417**</b> | 0.029           |
| <i>p</i>   | -  | -               | -          | 0.001          | 0.147  | 0.577  | 0.000          | 0.769           |
| NO3-N      | -  | -               | -          | 1              | 0.140  | -0.031 | 0.055          | 0.088           |
| <i>p</i>   | -  | -               | -          | -              | 0.151  | 0.754  | 0.575          | 0.367           |
| BOD5       | -  | -               | -          | -              | 1      | -0.039 | 0.069          | 0.031           |
| <i>p</i>   | -  | -               | -          | -              | -      | 0.689  | 0.482          | 0.754           |
| TSS        | -  | -               | -          | -              | -      | 1      | -0.118         | -0.066          |
| <i>p</i>   | -  | -               | -          | -              | -      | -      | 0.224          | 0.499           |
| DO         | -  | -               | -          | -              | -      | -      | 1              | -0.081          |
| <i>p</i>   | -  | -               | -          | -              | -      | -      | -              | .408            |
| PO4-P      | -  | -               | -          | -              | -      | -      | -              | 1               |

**Table S2.** Meteorological data recorded at Targoviste used for SWAT modeling  
(Source of data: <http://worldweather.wmo.int/en/home.html>)

| Precipitations (mm)     |                   |                     |                         |
|-------------------------|-------------------|---------------------|-------------------------|
| Period                  | Precipitation sum | Maximum daily value | Days with precipitation |
| 01.01.2016 - 31.12.2016 | 797               | 20                  | 129                     |
| 01.01.2017 - 31.12.2017 | 920               | 29                  | 123                     |
| 01.01.2018 - 31.12.2018 | 1103              | 33                  | 154                     |
| 01.06.2016 - 30.09.2016 | 263               | 20                  | 34                      |
| 01.06.2017 - 30.09.2017 | 305               | 28                  | 32                      |
| 01.06.2018 - 30.09.2018 | 547               | 33                  | 45                      |

|                             | Average | Minimum      | Maximum      |
|-----------------------------|---------|--------------|--------------|
|                             |         | (date)       | (date)       |
| Air temperature at 2-m (°C) |         |              |              |
| 01.01.2016 - 31.12.2016     | 9.4     | -15.7        | 34.3         |
|                             |         | (01.01.2016) | (18.06.2016) |
| 01.01.2017 - 31.12.2017     | 10.9    | -23          | 37.3         |
|                             |         | (09.01.2017) | (05.08.2017) |
| 01.01.2018 - 31.12.2018     | 11.3    | -19.1        | 33.2         |
|                             |         | (01.03.2018) | (02.09.2018) |
| Relative humidity (%)       |         |              |              |

|                         |    |                          |   |
|-------------------------|----|--------------------------|---|
| 01.01.2016 - 31.12.2016 | 77 | 23                       | - |
|                         |    | (01.08.2016)             | - |
| 01.01.2017 - 31.12.2017 | 77 | 14                       | - |
|                         |    | (02.04.2017)             | - |
| 01.01.2018 - 31.12.2018 | 78 | 21                       | - |
|                         |    | (14.10.2018; 25.10.2018) | - |

| Snow cover (cm)         |         |              |                              |                            |
|-------------------------|---------|--------------|------------------------------|----------------------------|
| Period                  | Average | Maximum      | Earliest day with snow cover | Latest day with snow cover |
|                         |         | (date)       |                              |                            |
| 01.01.2016 - 31.12.2016 | 6.1     | 22           | 13.12.2016                   | 06.02.2016                 |
|                         |         | (18.01.2016) |                              |                            |
| 01.01.2017 - 31.12.2017 | 9       | 21           | 17.12.2017                   | 21.04.2017                 |
|                         |         | (09.02.2017) |                              |                            |
| 01.01.2018 - 31.12.2018 | 5.1     | 21           | 17.11.2018                   | 26.03.2018                 |
|                         |         | (28.02.2018) |                              |                            |

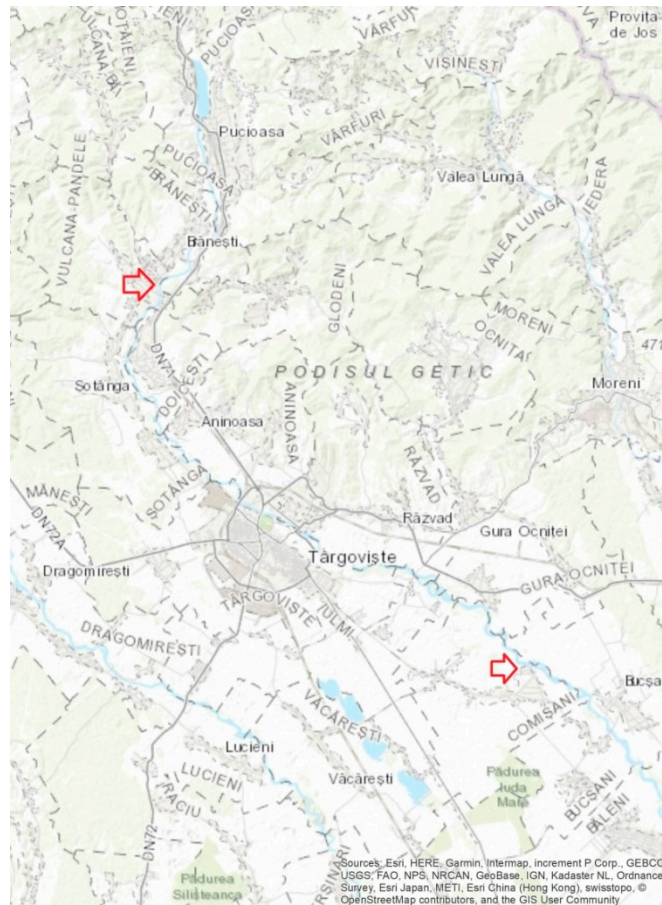

**Figure S7.** Position of the two monitoring points selected to characterize the impact of urban wastewaters on the Ialomița River quality

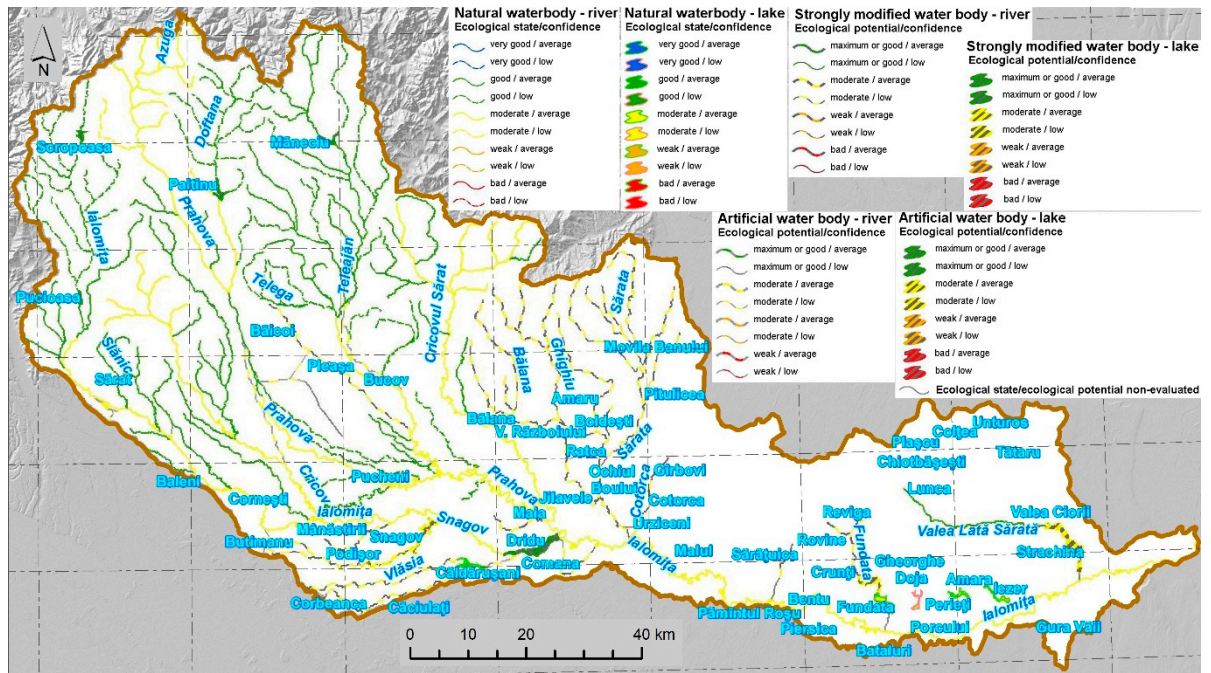

**Figure S8.** Ecological status assessment of the water bodies on the Ialomita River Basin and its tributaries (prepared based on ANAR Buzau-Ialomita datasets – <http://www.rowater.ro/dabuzau/default.aspx>)
